# Supplementary material
Source: PubMed Central journal article supplement (PMC4978044)
Supplement: ASN.2015060607_ASN2015060607SupplementaryData.pdf [file ASN.2015060607_ASN2015060607SupplementaryData.pdf]

## SUPPLEMENTARY FIGURES

**A**

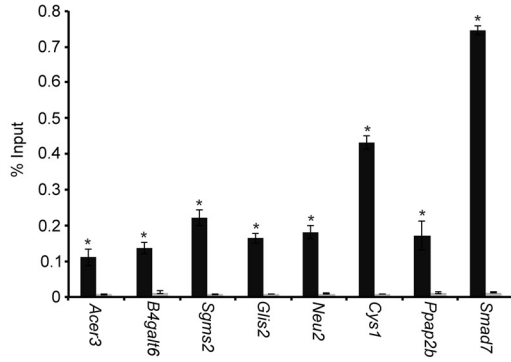

**B**

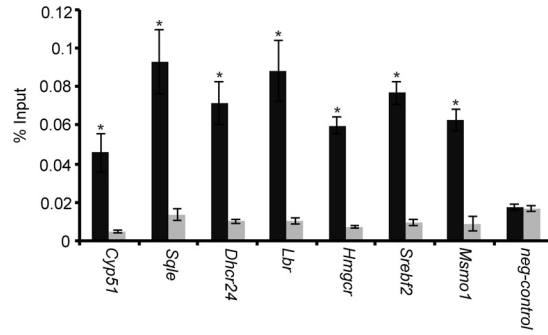

**C**

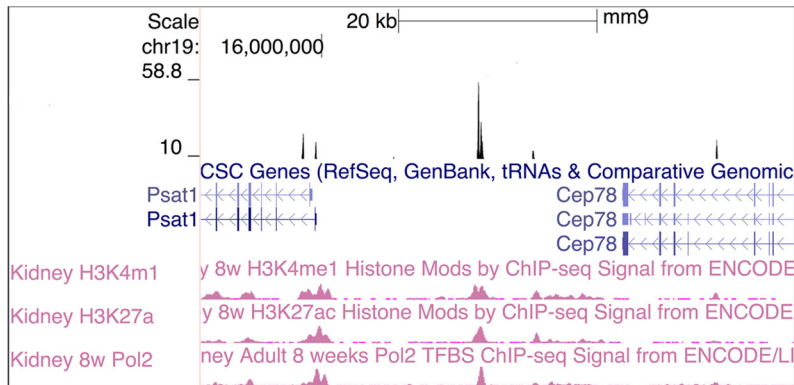

**D**

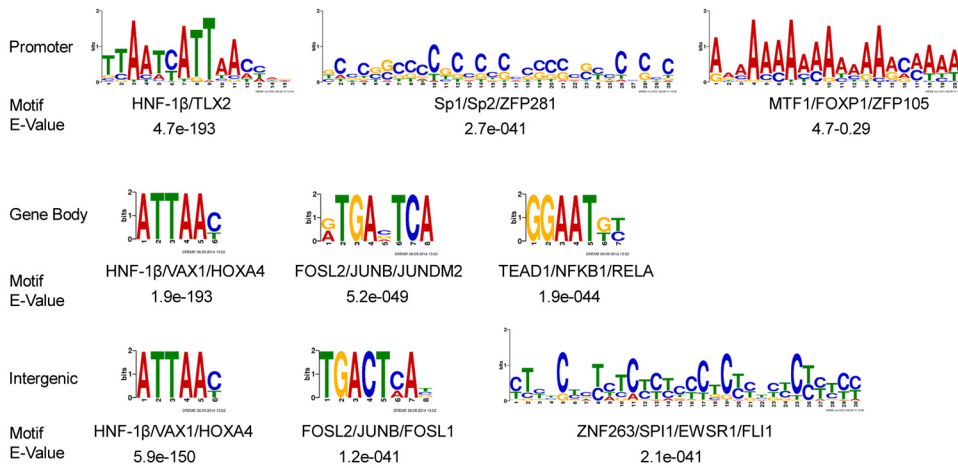

**SUPPLEMENTARY FIGURE 1.** A) Quantitative ChIP-qPCR verifying binding of HNF-1 $\beta$  near representative gene targets identified by ChIP-seq in mIMCD3 cells. Enrichment of HNF-1 $\beta$  and IgG binding was calculated according to the percent input method. Data represent means of three independent experiments. \* indicates significant enrichment of HNF-1 $\beta$  compared to control IgG ( $p < 0.05$ ). B) Quantitative ChIP-qPCR showing binding of HNF-1 $\beta$  near genes involved in cholesterol synthesis in uninduced 53A cells. Negative control shows amplification of an intergenic region not bound by HNF-1 $\beta$ . Enrichment was calculated relative to input. Data shown are mean  $\pm$  SE of three independent experiments. \* indicates  $p < 0.05$ . C) Representative ChIP-seq showing binding of HNF-1 $\beta$  (black peaks) to genomic sites located between the *Psat1* and *Cep78* genes (blue). HNF-1 $\beta$  binding sites correspond to histone marks of active enhancers (pink). Data were visualized using the UCSC Genome Browser. D) MEME software was used to predict *de novo* motifs that are statistically overrepresented within a 200-bp region centered on the genomic coordinates where HNF-1 $\beta$  is bound. Analysis was carried out on peaks from three different regions: promoters, gene bodies, and intergenic domains.

**A**

| Gene Symbol  | Common name                             | Log2 (microarray) | Log2 (qPCR) |
|--------------|-----------------------------------------|-------------------|-------------|
| <i>Fstl1</i> | Follistatin-related protein 1           | -0.69             | -1.8        |
| <i>Glis2</i> | Glis family zinc finger 2               | -0.56             | -1.28       |
| <i>Glis3</i> | Glis family zinc finger 3               | -0.6              | -0.68       |
| <i>Gli3</i>  | Gli family zinc finger 3                | 0.55              | 1.37        |
| <i>Pde4c</i> | Phosphodiesterase 4C-cAMP specific      | -0.77             | -4.12       |
| <i>Pkhd1</i> | Polycystic kidney and hepatic disease 1 | -1.47             | -2.88       |
| <i>Socs3</i> | Suppressor of cytokine signaling 3      | 0.72              | 2.23        |

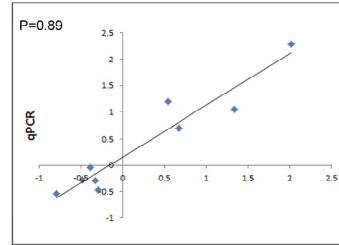

**B**

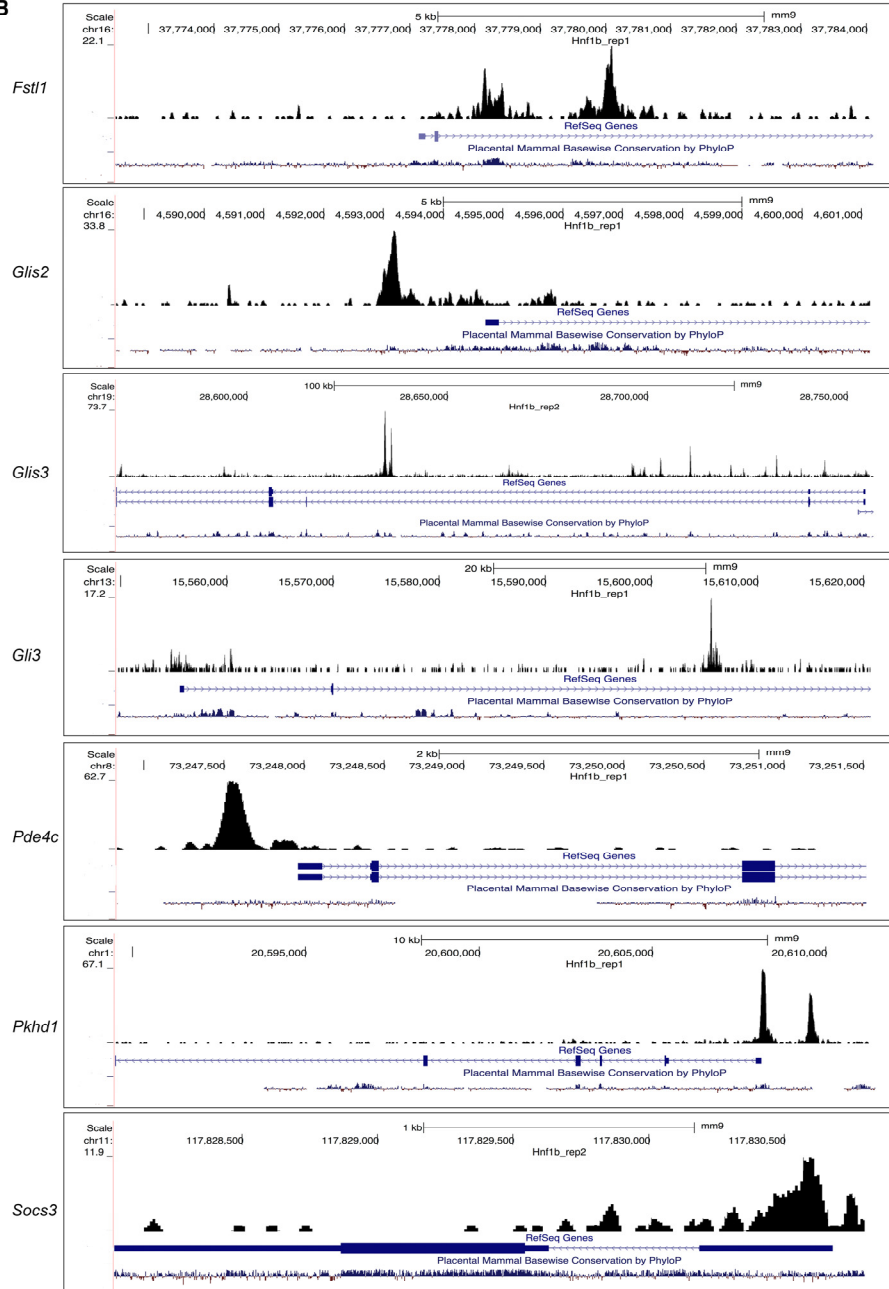

**SUPPLEMENTARY FIGURE 2.** A) Left panel: Changes in expression of representative HNF-1 $\beta$  target genes in cells expressing mutant HNF-1 $\beta$  measured by microarray analysis and qRT-PCR. Right panel: Correlation between microarray analysis and qRT-PCR. Pearson coefficient=0.89. B) ChIP-seq showing peaks of HNF-1 $\beta$  binding relative to the indicated genes in chromatin from mIMCD3 cells. Each panel shows genomic coordinates and size bar (top), HNF-1 $\beta$  binding peaks (black), gene exons and direction of transcription (blue), and evolutionary sequence conservation (bottom). Data were visualized using the UCSC Genome Browser (1).

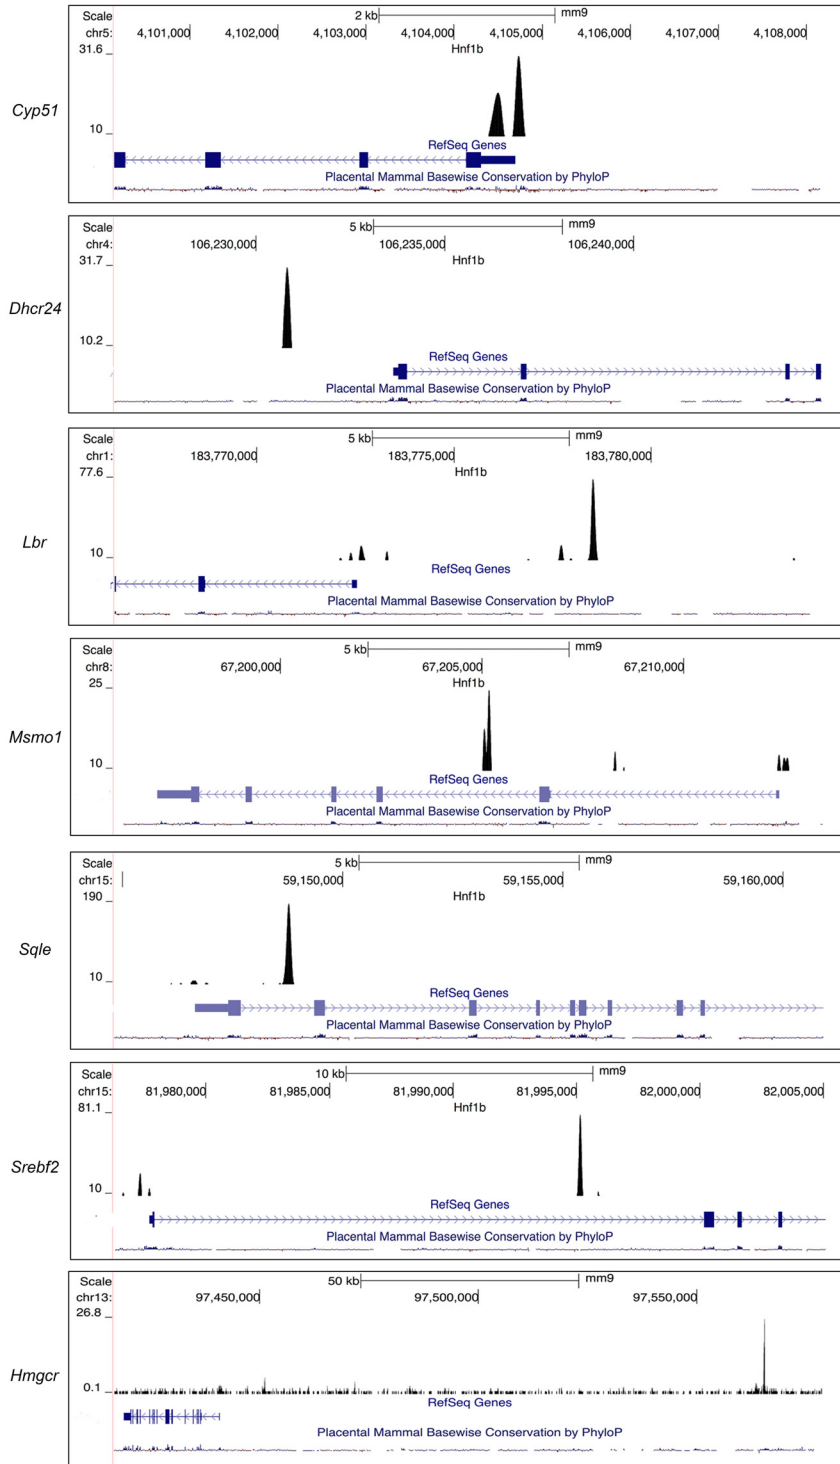

**SUPPLEMENTARY FIGURE 3.** ChIP-seq showing peaks of HNF-1 $\beta$  binding (black) relative to genes involved in cholesterol synthesis (blue). Data were visualized using the UCSC Genome Browser (1). Genomic coordinates are shown at the top, and plots of evolutionary sequence conservation are shown at the bottom of each panel.

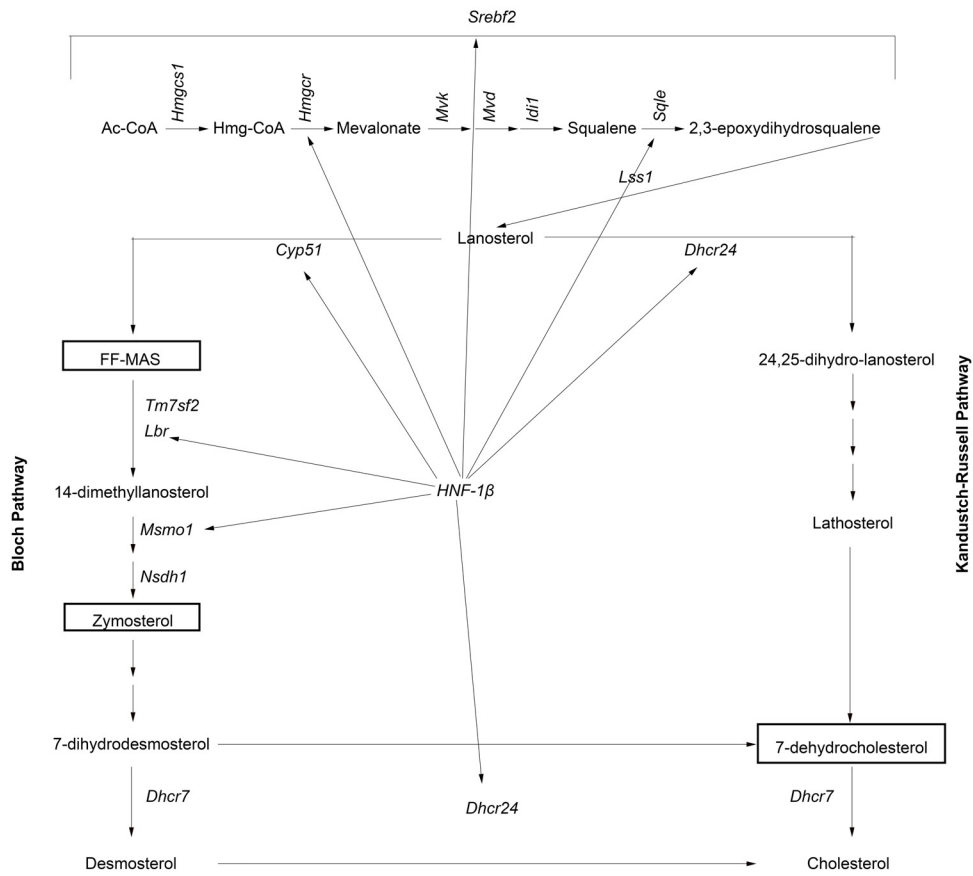

**SUPPLEMENTARY FIGURE 4.** Schematic diagram of the cholesterol synthesis pathway. Cholesterol intermediates that are down-regulated in cells expressing the HNF-1 $\beta$  $\Delta$ C mutant are indicated by rectangles. Genes that are directly regulated by HNF-1 $\beta$  are indicated by arrows.

**SUPPLEMENTARY TABLES**

| <b>Sample</b>       | <b>Uniquely Mapped Reads</b> | <b>Nonredundant fraction (NRF)</b> | <b>NSC</b> | <b>RSC</b> | <b>FRiP</b> | <b>Genomic coverage</b> |
|---------------------|------------------------------|------------------------------------|------------|------------|-------------|-------------------------|
| HNF-1 $\beta$ _Rep1 | 12,742,595                   | 0.986                              | 1.46       | 1.06       | 6.5%        | 26%                     |
| HNF-1 $\beta$ _Rep2 | 12,491,746                   | 0.986                              | 1.58       | 1.13       | 6.8%        |                         |
| IgG_Rep1            | 14,262,672                   | 0.994                              |            |            |             | 27%                     |
| IgG_Rep2            | 8,664,621                    | 0.993                              |            |            |             |                         |

**SUPPLEMENTARY TABLE 1.** Quality control analysis of the ChIP-seq samples. The ChIP-seq data for both HNF-1 $\beta$  and IgG fulfilled the criteria of the ENCODE consortium (>20 million total reads from two replicate samples, FRiP enrichment >1%, NSC  $\geq$ 1.05, RSC $\geq$ 0.8, and NRF  $\geq$ 0.8). NSC, normalized strand coefficient; RSC, relative strand coefficient; FRiP, fraction of reads in peaks.



| <b>Gene</b>    | <b>Forward primer (5'-3')</b> | <b>Reverse primer (5'-3')</b> |
|----------------|-------------------------------|-------------------------------|
| <i>Srebfl2</i> | gcagcaacgggaccattct           | cccatgactaagtcctcaact         |
| <i>Cyp51</i>   | gacaggaggcaacttgcttc          | gtggactttcgtccagc             |
| <i>Dhcr24</i>  | ctctgggtgcgagtgaagg           | ttcccggacctgtttctggat         |
| <i>Fdft1</i>   | atggagttcgtcaagtgtctagg       | cgtgccgtatgtcccatc            |
| <i>Hmgcr</i>   | agcttgcccgaattgtatgtg         | tctgttgaacctatgtgacttc        |
| <i>Hmgcs1</i>  | aactggtgcagaaatctctagc        | ggttgaatagctcagaactagcc       |
| <i>Idi1</i>    | accagccatcttgatgaaaaaca       | cagcaactattggtgaaacaacc       |
| <i>Lss</i>     | tcgtgggggaccctataaaac         | cgtcctccgcttgataataagtc       |
| <i>Msmo1</i>   | aaacaaaagtgttgccgtgttc        | aagcattctaaagggctcctg         |
| <i>Mvd</i>     | atggcctcagaaaagcctcag         | tggtcgttttagctggtcct          |
| <i>Mvk</i>     | ggtgtggtcggaaactccc           | ccttgagcgggttgagac            |
| <i>Nsdhl</i>   | aaggtgaagcacagttttcca         | gcaggttcaatgacagtctgg         |
| <i>Sqle</i>    | ataagaatgcgggatgtcac          | atatccgagaaggcagcgaac         |
| <i>Lbr</i>     | atgccaagtaggaagtttgtga        | gatttgtgtcgtggctcaga          |
| <i>Gli3</i>    | aacaattcctggaacgctgt          | tcccagcacgacactgtaga          |
| <i>Fstl1</i>   | cacggcgaggaggaaccta           | tcttgcattactgccacaca          |
| <i>Glis3</i>   | tgtggcatgaatctccaccg          | tgatgggaggatattgtgacc         |
| <i>Glis2</i>   | gacgagcccctcgacctaa           | agctctcgatgcaaagcatga         |
| <i>Pde4c</i>   | agctttgacctcgaaaatggg         | gtccgaacggtacaggaagg          |
| <i>Socs3</i>   | gcaagctgcaggagagcggatt        | aagaagtggcgtggtccga           |
| <i>Pkhd1</i>   | aagtcaaggccatcacatc           | atgtttctggtcaacagccc          |
| <i>Gli3</i>    | gaagaaacgcaatcactatgcag       | gtcccacggtaaggagaga           |
| <i>Pcsk9</i>   | ttgccccatgtggagtacatt         | gggagcggcttctcctgt            |
| <i>Srebfl1</i> | tgaccggctattccgtga            | ctgggctgagcaatacagtc          |
| <i>18S</i>     | gtaaccggtgaaccatt             | ccatcaatcggtagtagcg           |

**SUPPLEMENTARY TABLE 2.** Primers used for quantitative RT-PCR

| <b>Gene</b>     | <b>Forward (5'-3')</b>  | <b>Reverse (5'-3')</b>    |
|-----------------|-------------------------|---------------------------|
| <i>Acer3</i>    | gtgctcggcaaggttct       | tgctgttcctttcttctct       |
| <i>Cys1</i>     | gcgagattcctactcttggtaga | tcagcctggctgtgtatg        |
| <i>Glis2</i>    | gcctcagactctagtgatgttc  | ggatttaggaagaggtcggtc     |
| <i>Smad7</i>    | ctccttgacctgggagttac    | agccgcgatgcagattat        |
| <i>Dhcr24</i>   | gtagcttgcaaatgctgg      | ggaaatgaaatcttctgagcc     |
| <i>Lbr</i>      | caggtaaaggtgggaggtga    | agttggagagtgcctggcta      |
| <i>Neu2</i>     | acctgcctcttaaccattg     | acaagaacgcggccaa          |
| <i>Pcsk9</i>    | ttgcagcccaattaggattt    | gtgaaggtggaagccttctg      |
| <i>Sqle</i>     | cgtcgctgggtactcagggga   | aagcctgaagcagtccca        |
| <i>Srebf2</i>   | gtgtaggcatgtgaatgtgctg  | aatccccagcactcatacaaa     |
| <i>Cyp51a</i>   | acgaggtcccgcgtgctta     | gctctgctgacgccacatag      |
| <i>B4galt6</i>  | ggtcattattaactccgctcac  | aagacaatataactctgagcacatc |
| <i>Ppap2b</i>   | ctggcactcactcagtggt     | agctgctgtccttgtaga        |
| <i>Sgms2</i>    | tgcttaaccagacccttc      | gtagaattccgctcgtctc       |
| <i>Msmo</i>     | tctggaaaggcaccactacc    | aacattccaaggtgcttcg       |
| <i>Hmgcr</i>    | ttcggtttctctctggtt      | gcgagaaaattcttgccaaa      |
| <i>Neg-cont</i> | ggacaattcaaccgagggaaa   | tgaactggttggtgtgctc       |

**SUPPLEMENTARY TABLE 3.** Primers used for ChIP-qPCR
